# Supplementary material
Source: PubMed Central journal article supplement (PMC4936573)
Supplement: supp_pp.16.00397_PP2016-00397DR1_Figure_S2.pdf [file supp_pp.16.00397_PP2016-00397DR1_Figure_S2.pdf]

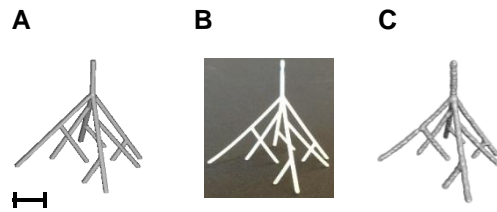

**Supplemental Figure S2.** X-ray reconstruction of a ground truth model. A) Digital model. B) Physical model after 3-D printing. C) Reconstruction from X-ray CT slices. Scale bar represents 10 mm in all images.
