# Supplementary material
Source: PubMed Central journal article supplement (PMC4936573)
Supplement: supp_pp.16.00397_PP2016-00397DR1_Supplemental_Materialtbls.pdf [file supp_pp.16.00397_PP2016-00397DR1_Supplemental_Materialtbls.pdf]

1  
2  
3  
4  
5  
6  
7  
8  
9  
10  
11  
12  
13  
14  
15  
16  
17  
18  
19  
20  
21  
22  
23  
24  
25  
26  
27  
28  
29  
30  
31  
32  
33  
34  
35  
36  
37  
38  
39  
40  
41  
42  
43  
44

---

Supp. Table S1. Particle size distribution in granular substrates

---

| Granular substrate | Roundness (%) | Particle distribution  |            |
|--------------------|---------------|------------------------|------------|
|                    |               | Size ( $\mu\text{m}$ ) | % of total |
| Fine beads         | 80            | > 420                  | 0          |
|                    |               | > 297                  | 5          |
|                    |               | > 210                  | 85         |
|                    |               | > 177                  | 95         |
| Coarse beads       | 80            | > 1410                 | 0          |
|                    |               | > 841                  | 5          |
|                    |               | > 595                  | 85         |
|                    |               | > 250                  | 95         |
| Sand               | -             | > 710                  | 0          |
|                    |               | > 500                  | 40         |
|                    |               | > 425                  | 56         |
|                    |               | > 300                  | 83.5       |
|                    |               | < 300                  | 16.5       |

---

45  
46

---

Supp. Table S2. Accuracy of RSA traits using a ground truth model

---

| Traits                         | Percent error |
|--------------------------------|---------------|
| Depth (mm)                     | 5.03          |
| Total length (mm)              | 11.85         |
| Width (mm)                     | 8.77          |
| Median root number             | 5.65          |
| Convex area (mm <sup>2</sup> ) | 6.67          |

---

Supp. Table S3. Significant difference between granular substrates for each cultivar.  
 Tukey HSD was used to compare least square means.

| Trait    | Level                    | - Level                  | p-Value |
|----------|--------------------------|--------------------------|---------|
| Diameter | Azucena,Fine beads       | Azucena,Sand             | 1       |
|          | Azucena,Coarse beads     | Azucena,Fine beads       | 0.9992  |
|          | Azucena,Coarse beads     | Azucena,Sand             | 0.8683  |
|          | Basmati 217,Fine beads   | Basmati 217,Coarse beads | 0.0004  |
|          | Basmati 217,Fine beads   | Basmati 217,Sand         | <.0001  |
|          | Basmati 217,Coarse beads | Basmati 217,Sand         | 0.1648  |
|          | Bala,Fine beads          | Bala,Coarse beads        | 0.9971  |
|          | Bala,Fine beads          | Bala,sand                | 0.7086  |
|          | Bala,Coarse beads        | Bala,sand                | 1       |
|          | Caiapo,Fine beads        | Caiapo,sand              | 0.0101  |
|          | Caiapo,Coarse beads      | Caiapo,Fine beads        | 1       |
|          | Caiapo,Coarse beads      | Caiapo,sand              | 0.0006  |
|          | CO39,Fine beads          | CO39,Coarse beads        | 0.9999  |
|          | CO39,Fine beads          | CO39,sand                | 0.9832  |
|          | CO39,Coarse beads        | CO39,sand                | 1       |
|          | IR64,Fine beads          | IR64,sand                | 0.6509  |
|          | IR64,Coarse beads        | IR64,Fine beads          | 0.8863  |
|          | IR64,Coarse beads        | IR64,sand                | 0.0002  |
|          | Moroberekan,Fine beads   | Moroberekan,Coarse beads | 0.9999  |
|          | Moroberekan,Fine beads   | Moroberekan,Sand         | 0.0223  |
|          | Moroberekan,Coarse beads | Moroberekan,Sand         | 0.5808  |
|          | Swarna,Fine beads        | Swarna,Coarse beads      | 1       |
|          | Swarna,Fine beads        | Swarna,Sand              | 0.0003  |
|          | Swarna,Coarse beads      | Swarna,Sand              | 0.0139  |

| Depth |                        |                          |        |
|-------|------------------------|--------------------------|--------|
|       | Azucena,Coarse beads   | Azucena,Sand             | 1      |
|       | Azucena,Fine beads     | Azucena,Sand             | 0.8842 |
|       | Azucena,Fine beads     | Azucena,Coarse beads     | 1      |
|       | Bala,Fine beads        | Bala,Coarse beads        | 0.9277 |
|       | Bala,Fine beads        | Bala,Sand                | 1      |
|       | Bala,Sand              | Bala,Coarse beads        | 1      |
|       | Basmati 217,Fine beads | Basmati 217,Coarse beads | 0.0001 |
|       | Basmati 217,Fine beads | Basmati 217,Sand         | 0.6418 |
|       | Basmati 217,Sand       | Basmati 217,Coarse beads | 0.2878 |
|       | Caiapo,Coarse beads    | Caiapo,Sand              | 0.0002 |
|       | Caiapo,Coarse beads    | Caiapo,Fine beads        | 1      |
|       | Caiapo,Fine beads      | Caiapo,Sand              | 0.0082 |
|       | CO39,Fine beads        | CO39,Coarse beads        | 1      |
|       | CO39,Sand              | CO39,Coarse beads        | <.0001 |
|       | CO39,Sand              | CO39,Fine beads          | <.0001 |
|       | IR64,Fine beads        | IR64,Coarse beads        | 0.3769 |
|       | IR64,Sand              | IR64,Coarse beads        | 0.1142 |
|       | IR64,Sand              | IR64,Fine beads          | 1      |
|       | Moroberekan,Fine beads | Moroberekan,Coarse beads | 0.9995 |
|       | Moroberekan,Fine beads | Moroberekan,Sand         | <.0001 |
|       | Moroberekan,Sand       | Moroberekan,Coarse beads | 0.9998 |
|       | Swarna,Fine beads      | Swarna,Coarse beads      | 0.9998 |
|       | Swarna,Fine beads      | Swarna,Sand              | <.0001 |
|       | Swarna,Sand            | Swarna,Coarse beads      | 1      |

## Total length

|                          |                          |        |
|--------------------------|--------------------------|--------|
| Azucena,Coarse beads     | Azucena,Sand             | 1      |
| Azucena,Fine beads       | Azucena,Sand             | 0.9653 |
| Azucena,Fine beads       | Azucena,Coarse beads     | 1      |
| Bala,Fine beads          | Bala,Coarse beads        | 0.9816 |
| Bala,Sand                | Bala,Coarse beads        | 0.8637 |
| Bala,Sand                | Bala,Fine beads          | <.0001 |
| Basmati 217,Fine beads   | Basmati 217,Coarse beads | 0.9441 |
| Basmati 217,Fine beads   | Basmati 217,Sand         | 1      |
| Basmati 217,Sand         | Basmati 217,Coarse beads | 1      |
| Caiapo,Coarse beads      | Caiapo,Sand              | 0.3893 |
| Caiapo,Fine beads        | Caiapo,Sand              | <.0001 |
| Caiapo,Fine beads        | Caiapo,Coarse beads      | 0.1972 |
| CO39,Coarse beads        | CO39,Fine beads          | 0.0884 |
| CO39,Coarse beads        | CO39,Sand                | 0.9467 |
| CO39,Sand                | CO39,Fine beads          | 0.9999 |
| IR64,Fine beads          | IR64,Coarse beads        | 0.2708 |
| IR64,Fine beads          | IR64,Sand                | 0.9998 |
| IR64,Sand                | IR64,Coarse beads        | 0.9345 |
| Moroberekan,Coarse beads | Moroberekan,Sand         | 0.9993 |
| Moroberekan,Fine beads   | Moroberekan,Sand         | 0.9984 |
| Moroberekan,Fine beads   | Moroberekan,Coarse beads | <.0001 |
| Swarna,Coarse beads      | Swarna,Sand              | 0.9997 |
| Swarna,Coarse beads      | Swarna,Fine beads        | <.0001 |
| Swarna,Fine beads        | Swarna,Sand              | 1      |

| Width |                        |                          |        |
|-------|------------------------|--------------------------|--------|
|       | Azucena,Fine beads     | Azucena,Coarse beads     | 1      |
|       | Azucena,Sand           | Azucena,Coarse beads     | 0.8607 |
|       | Azucena,Sand           | Azucena,Fine beads       | 0.9998 |
|       | Bala,Fine beads        | Bala,Coarse beads        | 0.9994 |
|       | Bala,Sand              | Bala,Coarse beads        | 0.0011 |
|       | Bala,Sand              | Bala,Fine beads          | 0.4058 |
|       | Basmati 217,Fine beads | Basmati 217,Coarse beads | 0.2012 |
|       | Basmati 217,Fine beads | Basmati 217,Sand         | 0.9998 |
|       | Basmati 217,Sand       | Basmati 217,Coarse beads | 0.8999 |
|       | Caiapo,Fine beads      | Caiapo,Coarse beads      | 0.0382 |
|       | Caiapo,Fine beads      | Caiapo,Sand              | 0.3162 |
|       | Caiapo,Sand            | Caiapo,Coarse beads      | <.0001 |
|       | CO39,Coarse beads      | CO39,Fine beads          | 0.9946 |
|       | CO39,Sand              | CO39,Fine beads          | 0.3627 |
|       | CO39,Sand              | CO39,Coarse beads        | 0.9994 |
|       | IR64,Fine beads        | IR64,Coarse beads        | <.0001 |
|       | IR64,Fine beads        | IR64,Sand                | 0.2215 |
|       | IR64,Sand              | IR64,Coarse beads        | 0.4455 |
|       | Moroberekan,Fine beads | Moroberekan,Coarse beads | 1      |
|       | Moroberekan,Sand       | Moroberekan,Coarse beads | 0.9909 |
|       | Moroberekan,Sand       | Moroberekan,Fine beads   | 1      |
|       | Swarna,Coarse beads    | Swarna,Fine beads        | <.0001 |
|       | Swarna,Sand            | Swarna,Fine beads        | 0.1216 |
|       | Swarna,Sand            | Swarna,Coarse beads      | 0.1134 |

## Convex area

|                        |                          |        |
|------------------------|--------------------------|--------|
| Azucena,Fine beads     | Azucena,Coarse beads     | 0.8294 |
| Azucena,Fine beads     | Azucena,Sand             | 1      |
| Azucena,Sand           | Azucena,Coarse beads     | 1      |
| Bala,Fine beads        | Bala,Coarse beads        | 0.914  |
| Bala,Sand              | Bala,Coarse beads        | 0.0791 |
| Bala,Sand              | Bala,Fine beads          | 1      |
| Basmati 217,Fine beads | Basmati 217,Coarse beads | 0.0223 |
| Basmati 217,Fine beads | Basmati 217,Sand         | 0.9127 |
| Basmati 217,Sand       | Basmati 217,Coarse beads | 0.9203 |
| Caiapo,Coarse beads    | Caiapo,Sand              | 0.4444 |
| Caiapo,Fine beads      | Caiapo,Sand              | 0.0002 |
| Caiapo,Fine beads      | Caiapo,Coarse beads      | 0.6555 |
| CO39,Coarse beads      | CO39,Fine beads          | 0.814  |
| CO39,Sand              | CO39,Fine beads          | 0.0185 |
| CO39,Sand              | CO39,Coarse beads        | 0.9719 |
| IR64,Fine beads        | IR64,Coarse beads        | <.0001 |
| IR64,Fine beads        | IR64,Sand                | 0.7971 |
| IR64,Sand              | IR64,Coarse beads        | 0.104  |
| Moroberekan,Fine beads | Moroberekan,Coarse beads | 0.9996 |
| Moroberekan,Sand       | Moroberekan,Coarse beads | 0.9935 |
| Moroberekan,Sand       | Moroberekan,Fine beads   | <.0001 |
| Swarna,Coarse beads    | Swarna,Fine beads        | <.0001 |
| Swarna,Sand            | Swarna,Fine beads        | 0.7336 |
| Swarna,Sand            | Swarna,Coarse beads      | 0.5144 |

| Median root number |                          |                        |        |
|--------------------|--------------------------|------------------------|--------|
|                    | Azucena,Coarse beads     | Azucena,Sand           | 1      |
|                    | Azucena,Fine beads       | Azucena,Sand           | 0.9991 |
|                    | Azucena,Fine beads       | Azucena,Coarse beads   | 1      |
|                    | Bala,Coarse beads        | Bala,Sand              | 1      |
|                    | Bala,Fine beads          | Bala,Sand              | 1      |
|                    | Bala,Fine beads          | Bala,Coarse beads      | 1      |
|                    | Basmati 217,Coarse beads | Basmati 217,Sand       | 0.9156 |
|                    | Basmati 217,Coarse beads | Basmati 217,Fine beads | 1      |
|                    | Basmati 217,Fine beads   | Basmati 217,Sand       | 1      |
|                    | Caiapo,Coarse beads      | Caiapo,Sand            | 1      |
|                    | Caiapo,Fine beads        | Caiapo,Sand            | 0.979  |
|                    | Caiapo,Fine beads        | Caiapo,Coarse beads    | 0.9983 |
|                    | CO39,Coarse beads        | CO39,Fine beads        | 0.1545 |
|                    | CO39,Coarse beads        | CO39,Sand              | 0.7901 |
|                    | CO39,Sand                | CO39,Fine beads        | 1      |
|                    | IR64,Coarse beads        | IR64,Sand              | 0.9967 |
|                    | IR64,Coarse beads        | IR64,Fine beads        | 1      |
|                    | IR64,Fine beads          | IR64,Sand              | 1      |
|                    | Moroberekan,Coarse beads | Moroberekan,Sand       | 0.6723 |
|                    | Moroberekan,Coarse beads | Moroberekan,Fine beads | 1      |
|                    | Moroberekan,Fine beads   | Moroberekan,Sand       | 0.9997 |
|                    | Swarna,Coarse beads      | Swarna,Sand            | 0.489  |
|                    | Swarna,Coarse beads      | Swarna,Fine beads      | 0.8852 |
|                    | Swarna,Fine beads        | Swarna,Sand            | 1      |



## Crown root number

|                          |                          |        |
|--------------------------|--------------------------|--------|
| Azucena,Coarse beads     | Azucena,Fine beads       | 1      |
| Azucena,Sand             | Azucena,Fine beads       | 0.5855 |
| Azucena,Sand             | Azucena,Coarse beads     | 0.6212 |
| Bala,Fine beads          | Bala,Coarse beads        | 1      |
| Bala,Sand                | Bala,Coarse beads        | 0.4024 |
| Bala,Sand                | Bala,Fine beads          | 0.8307 |
| Basmati 217,Coarse beads | Basmati 217,Fine beads   | 1      |
| Basmati 217,Coarse beads | Basmati 217,Sand         | 1      |
| Basmati 217,Sand         | Basmati 217,Fine beads   | 1      |
| Caiapo,Fine beads        | Caiapo,Coarse beads      | 1      |
| Caiapo,Sand              | Caiapo,Coarse beads      | 1      |
| Caiapo,Sand              | Caiapo,Fine beads        | 1      |
| CO39,Coarse beads        | CO39,Sand                | 1      |
| CO39,Coarse beads        | CO39,Fine beads          | 1      |
| CO39,Fine beads          | CO39,Sand                | 1      |
| IR64,Coarse beads        | IR64,Fine beads          | 1      |
| IR64,Sand                | IR64,Fine beads          | 1      |
| IR64,Sand                | IR64,Coarse beads        | 1      |
| Moroberekan,Fine beads   | Moroberekan,Coarse beads | 1      |
| Moroberekan,Sand         | Moroberekan,Coarse beads | 0.9999 |
| Moroberekan,Sand         | Moroberekan,Fine beads   | 1      |
| Swarna,Coarse beads      | Swarna,Fine beads        | 0.9999 |
| Swarna,Coarse beads      | Swarna,Sand              | 1      |
| Swarna,Sand              | Swarna,Fine beads        | 1      |

## Root biomass

|                        |                          |        |
|------------------------|--------------------------|--------|
| Azucena,Fine beads     | Azucena,Coarse beads     | 0.3101 |
| Azucena,Sand           | Azucena,Coarse beads     | <.0001 |
| Azucena,Sand           | Azucena,Fine beads       | 0.0011 |
| Basmati 217,Fine beads | Basmati 217,Coarse beads | 1      |
| Basmati 217,Sand       | Basmati 217,Coarse beads | 1      |
| Basmati 217,Sand       | Basmati 217,Fine beads   | 1      |
| Bala,Coarse beads      | Bala,Fine beads          | 1      |
| Bala,Sand              | Bala,Fine beads          | 0.0063 |
| Bala,Sand              | Bala,Coarse beads        | 0.0231 |
| Caiapo,Coarse beads    | Caiapo,Sand              | 1      |
| Caiapo,Fine beads      | Caiapo,Sand              | 1      |
| Caiapo,Fine beads      | Caiapo,Coarse beads      | 1      |
| CO39,Coarse beads      | CO39,Fine beads          | 1      |
| CO39,Sand              | CO39,Fine beads          | 1      |
| CO39,Sand              | CO39,Coarse beads        | 1      |
| IR64,Coarse beads      | IR64,Fine beads          | 1      |
| IR64,Sand              | IR64,Fine beads          | 0.9903 |
| IR64,Sand              | IR64,Coarse beads        | 1      |
| Moroberekan,Fine beads | Moroberekan,Coarse beads | 0.0724 |
| Moroberekan,Fine beads | Moroberekan,Sand         | 1      |
| Moroberekan,Sand       | Moroberekan,Coarse beads | 0.281  |
| Swarna,Fine beads      | Swarna,Coarse beads      | 1      |
| Swarna,Sand            | Swarna,Coarse beads      | 1      |
| Swarna,Sand            | Swarna,Fine beads        | 1      |

## Shoot biomass

|                          |                          |        |
|--------------------------|--------------------------|--------|
| Azucena,Coarse beads     | Azucena,Fine beads       | 0.8774 |
| Azucena,Coarse beads     | Azucena,Sand             | 1      |
| Azucena,Sand             | Azucena,Fine beads       | 0.9992 |
| Basmati 217,Coarse beads | Basmati 217,Fine beads   | 0.0033 |
| Basmati 217,Coarse beads | Basmati 217,Sand         | 0.904  |
| Basmati 217,Sand         | Basmati 217,Fine beads   | 0.7826 |
| Bala,Coarse beads        | Bala,Fine beads          | 0.3492 |
| Bala,Sand                | Bala,Fine beads          | 0.0642 |
| Bala,Sand                | Bala,Coarse beads        | 1      |
| Caiapo,Coarse beads      | Caiapo,Fine beads        | 0.2205 |
| Caiapo,Sand              | Caiapo,Fine beads        | 0.1611 |
| Caiapo,Sand              | Caiapo,Coarse beads      | 1      |
| CO39,Coarse beads        | CO39,Fine beads          | 0.0424 |
| CO39,Coarse beads        | CO39,Sand                | 0.9961 |
| CO39,Sand                | CO39,Fine beads          | 0.9835 |
| IR64,Coarse beads        | IR64,Fine beads          | 0.5508 |
| IR64,Sand                | IR64,Fine beads          | 0.428  |
| IR64,Sand                | IR64,Coarse beads        | 1      |
| Moroberekan,Coarse beads | Moroberekan,Fine beads   | 0.2673 |
| Moroberekan,Sand         | Moroberekan,Fine beads   | 0.1331 |
| Moroberekan,Sand         | Moroberekan,Coarse beads | 1      |
| Swarna,Coarse beads      | Swarna,Fine beads        | 0.7785 |
| Swarna,Sand              | Swarna,Fine beads        | 0.0008 |
| Swarna,Sand              | Swarna,Coarse beads      | 0.6435 |

Supp. Table S4. Least square means and connecting letters reports between simulated soils for each trait.

Tukey HSD was used to compare least square means. Levels not connected by the same letter are significantly different.

| Trait    | Cultivar    | Granular substrate | Least square mean | Standard error | Connecting letters |   |   |   |   |   |   |   |   |   |  |  |  |  |  |  |  |  |  |  |  |  |
|----------|-------------|--------------------|-------------------|----------------|--------------------|---|---|---|---|---|---|---|---|---|--|--|--|--|--|--|--|--|--|--|--|--|
| Diameter | Basmati 217 | Fine beads         | 0.354             | 0.011          | A                  |   |   |   |   |   |   |   |   |   |  |  |  |  |  |  |  |  |  |  |  |  |
|          | Swarna      | Fine beads         | 0.348             | 0.015          | A                  | B |   |   |   |   |   |   |   |   |  |  |  |  |  |  |  |  |  |  |  |  |
|          | Caiapo      | Coarse beads       | 0.342             | 0.016          | A                  | B | C |   |   |   |   |   |   |   |  |  |  |  |  |  |  |  |  |  |  |  |
|          | Caiapo      | Fine beads         | 0.326             | 0.016          | A                  | B | C | D |   |   |   |   |   |   |  |  |  |  |  |  |  |  |  |  |  |  |
|          | Swarna      | Coarse beads       | 0.325             | 0.014          | A                  | B | C | D |   |   |   |   |   |   |  |  |  |  |  |  |  |  |  |  |  |  |
|          | Moroberekan | Fine beads         | 0.321             | 0.016          | A                  | B | C | D | E |   |   |   |   |   |  |  |  |  |  |  |  |  |  |  |  |  |
|          | Azucena     | Coarse beads       | 0.298             | 0.014          | A                  | B | C | D | E | F |   |   |   |   |  |  |  |  |  |  |  |  |  |  |  |  |
|          | Moroberekan | Coarse beads       | 0.292             | 0.016          | A                  | B | C | D | E | F | G |   |   |   |  |  |  |  |  |  |  |  |  |  |  |  |
|          | IR64        | Coarse beads       | 0.276             | 0.015          |                    | B | C | D | E | F | G | H |   |   |  |  |  |  |  |  |  |  |  |  |  |  |
|          | Azucena     | Fine beads         | 0.267             | 0.016          |                    |   | C | D | E | F | G | H |   |   |  |  |  |  |  |  |  |  |  |  |  |  |
|          | Bala        | Fine beads         | 0.256             | 0.016          |                    |   |   | D | E | F | G | H | I |   |  |  |  |  |  |  |  |  |  |  |  |  |
|          | CO39        | Fine beads         | 0.255             | 0.016          |                    |   |   | D | E | F | G | H | I |   |  |  |  |  |  |  |  |  |  |  |  |  |
|          | Basmati 217 | Coarse beads       | 0.254             | 0.017          |                    |   |   | D | E | F | G | H | I |   |  |  |  |  |  |  |  |  |  |  |  |  |
|          | Azucena     | Sand               | 0.254             | 0.014          |                    |   |   | D | E | F | G | H | I |   |  |  |  |  |  |  |  |  |  |  |  |  |
|          | Swarna      | Sand               | 0.247             | 0.014          |                    |   |   |   | E | F | G | H | I |   |  |  |  |  |  |  |  |  |  |  |  |  |
|          | Moroberekan | Sand               | 0.235             | 0.015          |                    |   |   |   |   | F | G | H | I | J |  |  |  |  |  |  |  |  |  |  |  |  |
|          | Caiapo      | Sand               | 0.233             | 0.016          |                    |   |   |   |   | F | G | H | I | J |  |  |  |  |  |  |  |  |  |  |  |  |
|          | CO39        | Coarse beads       | 0.228             | 0.016          |                    |   |   |   |   | F | G | H | I | J |  |  |  |  |  |  |  |  |  |  |  |  |
|          | IR64        | Fine beads         | 0.227             | 0.017          |                    |   |   |   |   | F | G | H | I | J |  |  |  |  |  |  |  |  |  |  |  |  |
|          | Bala        | Coarse beads       | 0.224             | 0.013          |                    |   |   |   |   |   | G | H | I | J |  |  |  |  |  |  |  |  |  |  |  |  |
|          | CO39        | Sand               | 0.215             | 0.016          |                    |   |   |   |   |   | G | H | I | J |  |  |  |  |  |  |  |  |  |  |  |  |
|          | Bala        | Sand               | 0.205             | 0.014          |                    |   |   |   |   |   |   | H | I | J |  |  |  |  |  |  |  |  |  |  |  |  |
|          | Basmati 217 | Sand               | 0.181             | 0.014          |                    |   |   |   |   |   |   |   | I | J |  |  |  |  |  |  |  |  |  |  |  |  |
|          | IR64        | Sand               | 0.172             | 0.014          |                    |   |   |   |   |   |   |   |   | J |  |  |  |  |  |  |  |  |  |  |  |  |

| Depth |             |              |        |       |   |   |   |   |   |   |
|-------|-------------|--------------|--------|-------|---|---|---|---|---|---|
|       | Moroberekan | Fine beads   | 88.863 | 5.936 | A |   |   |   |   |   |
|       | Moroberekan | Sand         | 87.587 | 5.141 | A |   |   |   |   |   |
|       | Caiapo      | Coarse beads | 84.477 | 4.598 | A |   |   |   |   |   |
|       | Swarna      | Fine beads   | 82.246 | 5.141 | A | B |   |   |   |   |
|       | CO39        | Sand         | 80.413 | 5.936 | A | B |   |   |   |   |
|       | Azucena     | Fine beads   | 79.580 | 5.936 | A | B |   |   |   |   |
|       | Swarna      | Sand         | 78.893 | 5.141 | A | B |   |   |   |   |
|       | Caiapo      | Fine beads   | 78.678 | 4.847 | A | B |   |   |   |   |
|       | Moroberekan | Coarse beads | 77.340 | 5.936 | A | B | C |   |   |   |
|       | CO39        | Fine beads   | 76.296 | 5.141 | A | B |   |   |   |   |
|       | CO39        | Coarse beads | 76.077 | 5.141 | A | B |   |   |   |   |
|       | Swarna      | Coarse beads | 73.935 | 3.754 | A | B |   |   |   |   |
|       | Bala        | Fine beads   | 72.454 | 5.141 | A | B | C | D |   |   |
|       | Azucena     | Coarse beads | 71.465 | 5.936 | A | B | C | D | E |   |
|       | IR64        | Sand         | 69.993 | 4.384 | A | B | C | D | E |   |
|       | IR64        | Fine beads   | 69.055 | 5.496 | A | B | C | D | E |   |
|       | Bala        | Sand         | 66.286 | 4.598 | A | B | C | D | E |   |
|       | Basmati 217 | Fine beads   | 64.820 | 5.141 | A | B | C | D | E |   |
|       | Azucena     | Sand         | 61.450 | 5.936 | A | B | C | D | E |   |
|       | Bala        | Coarse beads | 59.070 | 4.033 |   | B | C | D | E |   |
|       | Caiapo      | Sand         | 48.881 | 5.141 |   |   | C | D | E | F |
|       | IR64        | Coarse beads | 48.328 | 4.598 |   |   |   | D | E | F |
|       | Basmati 217 | Sand         | 48.203 | 4.033 |   |   |   |   | E | F |
|       | Basmati 217 | Coarse beads | 31.514 | 3.754 |   |   |   |   |   | F |

|              |             |              |         |        |   |   |   |   |   |   |   |
|--------------|-------------|--------------|---------|--------|---|---|---|---|---|---|---|
| Total length | Caiapo      | Fine beads   | 379.024 | 22.219 | A |   |   |   |   |   |   |
|              | CO39        | Coarse beads | 353.295 | 23.566 | A | B |   |   |   |   |   |
|              | Moroberekan | Fine beads   | 333.885 | 27.212 | A | B | C |   |   |   |   |
|              | Moroberekan | Coarse beads | 330.729 | 27.212 | A | B | C |   |   |   |   |
|              | Azucena     | Fine beads   | 322.926 | 27.212 | A | B | C | D |   |   |   |
|              | IR64        | Fine beads   | 300.985 | 25.193 | A | B | C | D | E |   |   |
|              | Bala        | Sand         | 291.455 | 21.078 | A | B | C | D | E |   |   |
|              | Azucena     | Coarse beads | 290.745 | 27.212 | A | B | C | D | E |   |   |
|              | Bala        | Fine beads   | 283.571 | 23.566 | A | B | C | D | E |   |   |
|              | CO39        | Sand         | 281.841 | 27.212 | A | B | C | D | E |   |   |
|              | Caiapo      | Coarse beads | 281.110 | 21.078 | A | B | C | D | E |   |   |
|              | Moroberekan | Sand         | 280.037 | 23.566 | A | B | C | D | E |   |   |
|              | IR64        | Sand         | 259.591 | 20.097 |   | B | C | D | E |   |   |
|              | Swarna      | Coarse beads | 253.501 | 17.210 |   | B | C | D | E |   |   |
|              | Azucena     | Sand         | 249.645 | 27.212 | A | B | C | D | E | F |   |
|              | Swarna      | Fine beads   | 245.441 | 23.566 |   | B | C | D | E | F |   |
|              | CO39        | Fine beads   | 236.587 | 23.566 |   | B | C | D | E | F |   |
|              | Bala        | Coarse beads | 229.693 | 18.487 |   |   | C | D | E | F |   |
|              | Swarna      | Sand         | 214.198 | 23.566 |   |   | C | D | E | F | G |
|              | IR64        | Coarse beads | 200.547 | 21.078 |   |   |   | D | E | F | G |
|              | Caiapo      | Sand         | 190.207 | 23.566 |   |   |   | D | E | F | G |
|              | Basmati 217 | Fine beads   | 182.893 | 23.566 |   |   |   |   | E | F | G |
|              | Basmati 217 | Sand         | 150.737 | 18.487 |   |   |   |   |   | F | G |
|              | Basmati 217 | Coarse beads | 124.694 | 17.210 |   |   |   |   |   |   | G |

|       |             |              |        |       |   |   |   |   |   |   |   |   |   |   |   |   |  |  |  |  |
|-------|-------------|--------------|--------|-------|---|---|---|---|---|---|---|---|---|---|---|---|--|--|--|--|
| Width | IR64        | Fine beads   | 44.031 | 2.618 | A |   |   |   |   |   |   |   |   |   |   |   |  |  |  |  |
|       | Azucena     | Sand         | 41.129 | 2.828 | A | B |   |   |   |   |   |   |   |   |   |   |  |  |  |  |
|       | Moroberekan | Sand         | 39.634 | 2.449 | A | B |   |   |   |   |   |   |   |   |   |   |  |  |  |  |
|       | Moroberekan | Fine beads   | 36.525 | 2.828 | A | B | C | D |   |   |   |   |   |   |   |   |  |  |  |  |
|       | Caiapo      | Fine beads   | 36.329 | 2.309 | A | B | C |   |   |   |   |   |   |   |   |   |  |  |  |  |
|       | Azucena     | Fine beads   | 35.871 | 2.828 | A | B | C | D |   |   |   |   |   |   |   |   |  |  |  |  |
|       | IR64        | Sand         | 33.490 | 2.088 | A | B | C | D | E |   |   |   |   |   |   |   |  |  |  |  |
|       | Moroberekan | Coarse beads | 33.283 | 2.828 | A | B | C | D | E | F |   |   |   |   |   |   |  |  |  |  |
|       | Azucena     | Coarse beads | 32.296 | 2.828 | A | B | C | D | E | F |   |   |   |   |   |   |  |  |  |  |
|       | Bala        | Sand         | 31.264 | 2.190 |   | B | C | D | E | F |   |   |   |   |   |   |  |  |  |  |
|       | CO39        | Sand         | 30.829 | 2.828 | A | B | C | D | E | F | G |   |   |   |   |   |  |  |  |  |
|       | Caiapo      | Sand         | 26.289 | 2.449 |   |   | C | D | E | F | G | H |   |   |   |   |  |  |  |  |
|       | CO39        | Coarse beads | 25.576 | 2.449 |   |   | C | D | E | F | G | H | I | J |   |   |  |  |  |  |
|       | IR64        | Coarse beads | 25.023 | 2.190 |   |   | C | D | E | F | G | H |   | J |   |   |  |  |  |  |
|       | Swarna      | Sand         | 24.871 | 2.449 |   |   | C | D | E | F | G | H | I | J | K |   |  |  |  |  |
|       | Caiapo      | Coarse beads | 24.310 | 2.190 |   |   |   | D | E | F | G | H | I | J |   |   |  |  |  |  |
|       | Basmati 217 | Fine beads   | 23.388 | 2.449 |   |   |   | D | E | F | G | H | I | J | K |   |  |  |  |  |
|       | Bala        | Fine beads   | 21.894 | 2.449 |   |   |   |   | E | F | G | H | I | J | K |   |  |  |  |  |
|       | CO39        | Fine beads   | 19.933 | 2.449 |   |   |   |   |   | F | G | H | I | J | K |   |  |  |  |  |
|       | Basmati 217 | Sand         | 19.292 | 1.921 |   |   |   |   |   |   | G | H | I | J | K |   |  |  |  |  |
|       | Bala        | Coarse beads | 17.533 | 1.921 |   |   |   |   |   |   |   | H | I | J | K |   |  |  |  |  |
|       | Swarna      | Coarse beads | 14.522 | 1.788 |   |   |   |   |   |   |   |   | I |   | K |   |  |  |  |  |
|       | Basmati 217 | Coarse beads | 13.719 | 1.788 |   |   |   |   |   |   |   |   |   |   | K |   |  |  |  |  |
|       | Swarna      | Fine beads   | 13.141 | 2.449 |   |   |   |   |   |   |   |   |   | I | J | K |  |  |  |  |

|             |             |              |          |         |   |   |   |   |   |   |   |   |   |   |  |  |  |  |   |
|-------------|-------------|--------------|----------|---------|---|---|---|---|---|---|---|---|---|---|--|--|--|--|---|
| Convex area | Moroberekan | Sand         | 2352.833 | 144.705 | A |   |   |   |   |   |   |   |   |   |  |  |  |  |   |
|             | Moroberekan | Fine beads   | 2307.364 | 167.091 | A | B |   |   |   |   |   |   |   |   |  |  |  |  |   |
|             | Azucena     | Fine beads   | 2131.981 | 167.091 | A | B | C |   |   |   |   |   |   |   |  |  |  |  |   |
|             | IR64        | Fine beads   | 2015.905 | 154.696 | A | B | C |   |   |   |   |   |   |   |  |  |  |  |   |
|             | Moroberekan | Coarse beads | 1987.345 | 167.091 | A | B | C | D |   |   |   |   |   |   |  |  |  |  |   |
|             | Caiapo      | Fine beads   | 1928.559 | 136.429 | A | B | C | D |   |   |   |   |   |   |  |  |  |  |   |
|             | CO39        | Sand         | 1905.398 | 167.091 | A | B | C | D |   |   |   |   |   |   |  |  |  |  |   |
|             | Azucena     | Sand         | 1859.964 | 167.091 | A | B | C | D | E |   |   |   |   |   |  |  |  |  |   |
|             | Azucena     | Coarse beads | 1596.211 | 167.091 | A | B | C | D | E | F |   |   |   |   |  |  |  |  |   |
|             | IR64        | Sand         | 1556.424 | 123.405 |   | B | C | D | E | F |   |   |   |   |  |  |  |  |   |
|             | CO39        | Coarse beads | 1492.576 | 144.705 |   | B | C | D | E | F | G | H |   |   |  |  |  |  |   |
|             | Caiapo      | Coarse beads | 1453.675 | 129.428 |   |   | C | D | E | F |   | H |   |   |  |  |  |  |   |
|             | Bala        | Sand         | 1437.333 | 129.428 |   |   | C | D | E | F | G | H |   |   |  |  |  |  |   |
|             | Swarna      | Sand         | 1319.990 | 144.705 |   |   | C | D | E | F | G | H | I |   |  |  |  |  |   |
|             | Bala        | Fine beads   | 1211.801 | 144.705 |   |   |   | D | E | F | G | H | I |   |  |  |  |  |   |
|             | Basmati 217 | Fine beads   | 1084.319 | 144.705 |   |   |   |   | E | F | G | H | I |   |  |  |  |  |   |
|             | CO39        | Fine beads   | 1023.149 | 144.705 |   |   |   |   |   | F | G | H | I | J |  |  |  |  |   |
|             | IR64        | Coarse beads | 940.466  | 129.428 |   |   |   |   |   | F | G | H | I | J |  |  |  |  |   |
|             | Caiapo      | Sand         | 910.182  | 144.705 |   |   |   |   |   | F | G | H | I | J |  |  |  |  |   |
|             | Swarna      | Coarse beads | 834.823  | 105.677 |   |   |   |   |   |   | G |   | I | J |  |  |  |  |   |
|             | Bala        | Coarse beads | 827.874  | 113.516 |   |   |   |   |   |   | G | H | I | J |  |  |  |  |   |
|             | Swarna      | Fine beads   | 825.135  | 144.705 |   |   |   |   |   |   | G | H | I | J |  |  |  |  |   |
|             | Basmati 217 | Sand         | 699.767  | 113.516 |   |   |   |   |   |   |   |   | I | J |  |  |  |  |   |
|             | Basmati 217 | Coarse beads | 378.699  | 105.677 |   |   |   |   |   |   |   |   |   |   |  |  |  |  | J |



|                          |             |              |       |       |     |
|--------------------------|-------------|--------------|-------|-------|-----|
| Median<br>root<br>number | CO39        | Coarse beads | 3.625 | 0.333 | A   |
|                          | Moroberekan | Coarse beads | 3.483 | 0.385 | A B |
|                          | Caiapo      | Fine beads   | 3.308 | 0.314 | A B |
|                          | Azucena     | Fine beads   | 3.188 | 0.385 | A B |
|                          | IR64        | Coarse beads | 3.163 | 0.298 | A B |
|                          | Azucena     | Coarse beads | 3.008 | 0.385 | A B |
|                          | Bala        | Fine beads   | 2.972 | 0.333 | A B |
|                          | Moroberekan | Fine beads   | 2.883 | 0.385 | A B |
|                          | Swarna      | Coarse beads | 2.868 | 0.243 | A B |
|                          | Bala        | Coarse beads | 2.848 | 0.261 | A B |
|                          | IR64        | Fine beads   | 2.782 | 0.356 | A B |
|                          | Caiapo      | Coarse beads | 2.660 | 0.298 | A B |
|                          | Basmati 217 | Coarse beads | 2.577 | 0.243 | A B |
|                          | Bala        | Sand         | 2.535 | 0.298 | A B |
|                          | IR64        | Sand         | 2.516 | 0.284 | A B |
|                          | Caiapo      | Sand         | 2.475 | 0.333 | A B |
|                          | CO39        | Sand         | 2.438 | 0.385 | A B |
|                          | Azucena     | Sand         | 2.404 | 0.385 | A B |
|                          | Basmati 217 | Fine beads   | 2.231 | 0.333 | A B |
|                          | Moroberekan | Sand         | 2.209 | 0.333 | A B |
|                          | CO39        | Fine beads   | 2.072 | 0.333 | A B |
|                          | Swarna      | Fine beads   | 1.978 | 0.333 | A B |
|                          | Basmati 217 | Sand         | 1.833 | 0.261 | B   |
|                          | Swarna      | Sand         | 1.738 | 0.333 | B   |

|                   |             |              |        |       |   |   |   |   |   |   |   |
|-------------------|-------------|--------------|--------|-------|---|---|---|---|---|---|---|
| Crown root number | Bala        | Sand         | 13.200 | 0.683 | A |   |   |   |   |   |   |
|                   | Bala        | Fine beads   | 10.900 | 0.836 | A | B | C |   |   |   |   |
|                   | CO39        | Coarse beads | 10.846 | 0.733 | A | B |   |   |   |   |   |
|                   | Bala        | Coarse beads | 10.722 | 0.623 | A | B | C | D |   |   |   |
|                   | CO39        | Fine beads   | 10.000 | 0.836 | A | B |   |   |   |   |   |
|                   | Azucena     | Sand         | 9.786  | 0.706 | A | B | C | D | E |   |   |
|                   | CO39        | Sand         | 9.750  | 0.935 | A | B | C | D | E | F |   |
|                   | IR64        | Sand         | 8.938  | 0.661 |   | B | C | D | E | F |   |
|                   | IR64        | Coarse beads | 8.643  | 0.706 |   | B | C | D | E | F | G |
|                   | Moroberekan | Sand         | 8.182  | 0.797 |   | B | C | D | E | F | G |
|                   | IR64        | Fine beads   | 8.000  | 0.836 |   | B | C | D | E | F | G |
|                   | Azucena     | Coarse beads | 8.000  | 0.683 |   | B | C | D | E | F | G |
|                   | Moroberekan | Fine beads   | 7.900  | 0.836 |   | B | C | D | E | F | G |
|                   | Azucena     | Fine beads   | 7.727  | 0.797 |   |   | C | D | E | F | G |
|                   | Basmati 217 | Coarse beads | 7.118  | 0.641 |   | B | C | D | E | F | G |
|                   | Caiapo      | Sand         | 7.000  | 0.935 |   | B | C | D | E | F | G |
|                   | Basmati 217 | Sand         | 6.875  | 0.661 |   |   |   | D | E | F | G |
|                   | Caiapo      | Fine beads   | 6.800  | 0.683 |   |   |   | D | E | F | G |
|                   | Moroberekan | Coarse beads | 6.786  | 0.706 |   |   |   | D | E | F | G |
|                   | Caiapo      | Coarse beads | 6.636  | 0.797 |   |   |   | D | E | F | G |
|                   | Swarna      | Coarse beads | 6.412  | 0.641 |   |   |   |   | E | F | G |
|                   | Basmati 217 | Fine beads   | 6.348  | 0.551 |   |   |   | D | E | F | G |
|                   | Swarna      | Sand         | 5.273  | 0.797 |   |   |   |   |   | F | G |
|                   | Swarna      | Fine beads   | 5.167  | 0.763 |   |   |   |   |   |   | G |

| Root biomass | Genotype    | Substrate    | Yield (g) | Standard Error (SE) | Significance Group |
|--------------|-------------|--------------|-----------|---------------------|--------------------|
|              | Azucena     | Sand         | 0.016     | 0.001               | A                  |
|              | Caiapo      | Fine beads   | 0.016     | 0.001               | A B                |
|              | Caiapo      | Coarse beads | 0.015     | 0.001               | A B C              |
|              | Moroberekan | Fine beads   | 0.015     | 0.001               | A B C D            |
|              | Caiapo      | Sand         | 0.015     | 0.001               | A B C D            |
|              | Moroberekan | Sand         | 0.014     | 0.001               | A B C D E          |
|              | IR64        | Sand         | 0.014     | 0.001               | A B C D E          |
|              | IR64        | Coarse beads | 0.013     | 0.001               | A B C D E F        |
|              | IR64        | Fine beads   | 0.011     | 0.001               | B C D E F G        |
|              | Azucena     | Fine beads   | 0.011     | 0.001               | C D E F G H I      |
|              | Bala        | Sand         | 0.010     | 0.001               | D E F G I          |
|              | Moroberekan | Coarse beads | 0.010     | 0.001               | D E F G I          |
|              | Basmati 217 | Sand         | 0.010     | 0.001               | E F G H I          |
|              | Basmati 217 | Fine beads   | 0.009     | 0.001               | F G H I J          |
|              | Basmati 217 | Coarse beads | 0.009     | 0.001               | F G H I J          |
|              | Swarna      | Sand         | 0.007     | 0.001               | G H I J            |
|              | CO39        | Sand         | 0.007     | 0.001               | G H I J            |
|              | Swarna      | Fine beads   | 0.007     | 0.001               | G H I J            |
|              | Azucena     | Coarse beads | 0.007     | 0.001               | G H I J            |
|              | Bala        | Coarse beads | 0.006     | 0.001               | H I J              |
|              | CO39        | Coarse beads | 0.006     | 0.001               | H I J              |
|              | CO39        | Fine beads   | 0.006     | 0.001               | H I J              |
|              | Swarna      | Coarse beads | 0.006     | 0.001               | H I J              |
|              | Bala        | Fine beads   | 0.005     | 0.001               | J                  |



Supp. Table S5. Cultivar dry weight in gel  
Values shown are means and standard deviation of at least 10 plants.

| Substrate | Cultivar    | Root (mg)  | Shoot (mg) | Root/Shoot |
|-----------|-------------|------------|------------|------------|
| 1X gel    | Azucena     | 5.3 ± 1.9  | 12.7 ± 4.2 | 0.4 ± 0.2  |
|           | Basmati 217 | 7.9 ± 1.4  | 9.0 ± 1.8  | 0.9 ± 0.3  |
|           | Bala        | 4.9 ± 0.5  | 11.4 ± 1.4 | 0.4 ± 0.1  |
|           | Caiapo      | 13.9 ± 2.6 | 7.7 ± 1.9  | 1.9 ± 0.5  |
|           | CO39        | 4.7 ± 1.2  | 13.3 ± 2.6 | 0.4 ± 0.1  |
|           | IR64        | 11.4 ± 2.2 | 5.5 ± 1.8  | 2.4 ± 1.0  |
|           | Moroberekan | 6.9 ± 2.4  | 13.2 ± 2.7 | 0.5 ± 0.1  |
|           | Swarna      | 3.8 ± 0.6  | 9.8 ± 3.0  | 0.4 ± 0.2  |
| 6X gel    | Azucena     | 6.2 ± 2.0  | 14.1 ± 1.9 | 0.4 ± 0.2  |
|           | Basmati 217 | 6.0 ± 2.2  | 6.8 ± 1.8  | 0.9 ± 0.3  |
|           | Bala        | 4.5 ± 1.0  | 10.9 ± 3.4 | 0.5 ± 0.2  |
|           | Caiapo      | 16.2 ± 1.4 | 7.1 ± 1.6  | 2.4 ± 0.8  |
|           | CO39        | 5.5 ± 0.9  | 15.7 ± 2.3 | 0.4 ± .01  |
|           | IR64        | 11.0 ± 2.8 | 6.2 ± 2.1  | 2.0 ± 0.9  |
|           | Moroberekan | 7.2 ± 2.3  | 12.0 ± 2.1 | 0.6 ± 0.1  |
|           | Swarna      | 3.8 ± 0.8  | 10.5 ± 1.1 | 0.4 ± 0.1  |
